# Supplementary material for: The Protein Secretome Is Altered in Rectal Cancer Tissue Compared to Normal Rectal Tissue, and Alterations in the Secretome Induce Enhanced Innate Immune Responses
Source: PubMed Central journal article supplement (PMC7867296; doi:10.3390/cancers13030571), 2021-02-02
Supplement: cancers-13-00571-s001.pdf [file cancers-13-00571-s001.pdf]

Supplementary materials

# The Protein Secretome Is Altered in Rectal Cancer Tissue Compared to Normal Rectal Tissue, and Alterations in the Secretome Induce Enhanced Innate Immune Responses

Aisling B. Heeran<sup>1</sup>, Margaret R. Dunne<sup>1</sup>, Maria E. Morrissey<sup>1</sup>, Croí E. Buckley<sup>1</sup>, Niamh Clarke<sup>1</sup>, Aoife Cannon<sup>1</sup>, Noel E. Donlon<sup>1</sup>, Timothy S. Nugent<sup>1</sup>, Michael Durand<sup>2</sup>, Cara Dunne<sup>2</sup>, John O. Larkin<sup>2</sup>, Brian Mehigan<sup>2</sup>, Paul McCormick<sup>2</sup>, Niamh Lynam-Lennon<sup>1</sup> and Jacintha O'Sullivan<sup>1,\*</sup>

<sup>1</sup> Trinity St. James's Cancer Institute, Trinity Translational Medicine Institute, Department of Surgery, Trinity College Dublin and St. James's Hospital, Dublin 8, D08 W9RT, Ireland; heerana@tcd.ie (A.B.H.); dunnem12@tcd.ie (M.R.D.); miamorrissey@gmail.com (M.E.M.); bucklecr@tcd.ie (C.E.B.); clarken1@tcd.ie (N.C.); cannona@tcd.ie (A.C.); donlonn@tcd.ie (N.E.D.); nugentti@tcd.ie (T.S.N.); lynamlen@tcd.ie (N.L.-L.)

<sup>2</sup> GEMS, St. James's Hospital, Dublin 8, D08 NHY1, Ireland; durandm@tcd.ie (M.D.); cardunne@stjames.ie (C.D.); jlarkin@stjames.ie (J.O.L.); bmehigan@stjames.ie (B.M.); pmccormick@stjames.ie (P.M.)

\* Correspondence: osullij4@tcd.ie; Fax: +353-(0)18964122

## Supplementary materials

**Citation:** Heeran, A.B.; Dunne, M.R.; Morrissey, M.E.; Buckley, C.E.; Clarke, N.; Cannon, A.; Donlon, N.E.; Nugent, T.S.; Durand, M.; Dunne, C.; et al. The Protein Secretome is Altered in Rectal Cancer Tissue Compared to Normal Rectal Tissue and Alterations in the Secretome Induce Enhanced Innate Immune Responses. *Cancers* **2021**, *13*, 571. <https://doi.org/10.3390/cancers13030571>

Received: 12 January 2021

Accepted: 25 January 2021

Published: 2 February 2021

**Publisher's Note:** MDPI stays neutral with regard to jurisdictional claims in published maps and institutional affiliations.

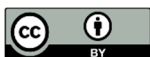

**Copyright:** © 2021 by the authors. Licensee MDPI, Basel, Switzerland. This article is an open access article distributed under the terms and conditions of the Creative Commons Attribution (CC BY) license (<http://creativecommons.org/licenses/by/4.0/>).

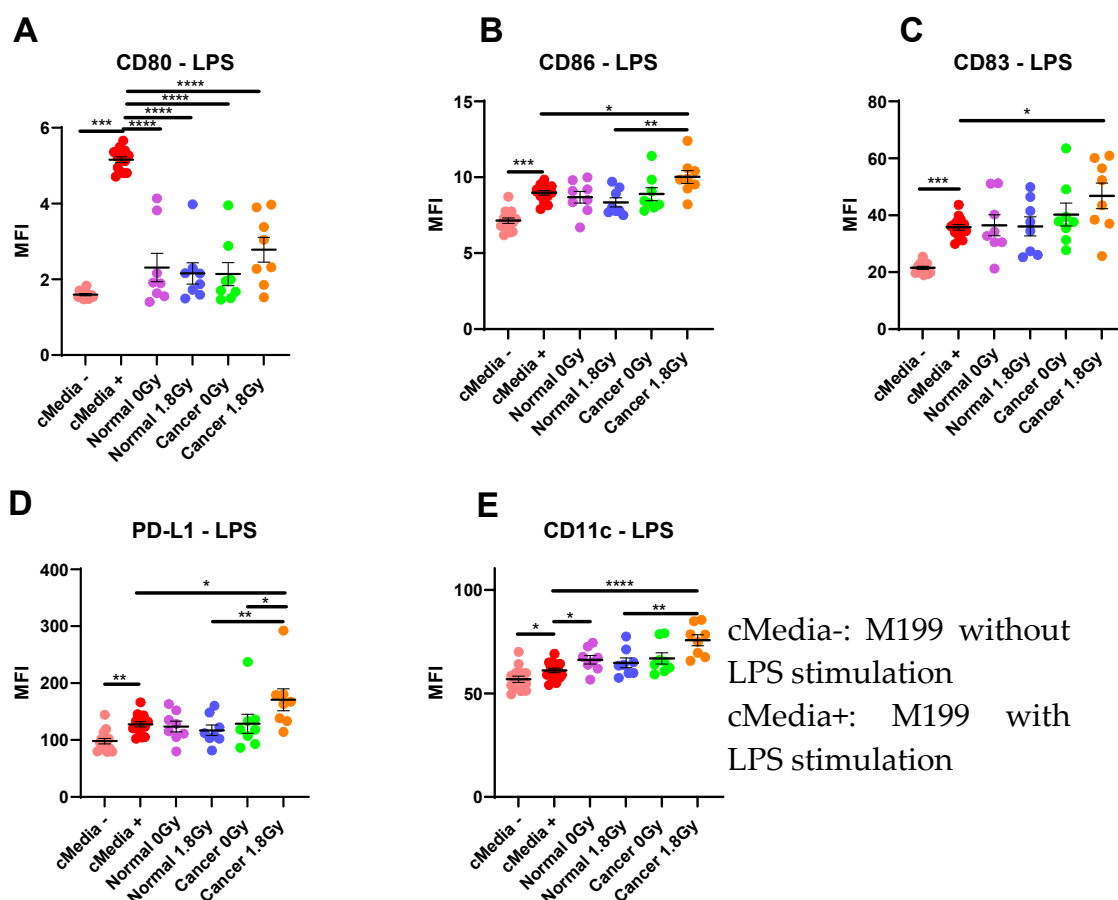

**Figure S1.** The effect of NCM and TCM on unstimulated dendritic cells. **(A)** Expression levels of CD80 were significantly inhibited by NCM and TCM from both mock-irradiated and irradiated biopsies compared to LPS-induced expression of CD80. **(B)** Expression of CD86 was significantly elevated on DCs treated with TCM from irradiated rectal cancer biopsies compared to LPS-induced expression of CD86. TCM from irradiated rectal cancer biopsies induced significantly higher expression of CD86 compared to NCM from irradiated normal rectal biopsies. **(C)** TCM from irradiated rectal cancer tissue induced higher expression of CD83 compared to LPS-induced expression of CD83. **(D)** PD-L1 expression was significantly elevated on DCs treated with TCM from irradiated rectal cancer biopsies compared to LPS-induced expression of PD-L1. TCM from irradiated rectal cancer tissue enhanced expression of PD-L1 compared to TCM from mock-irradiated rectal cancer tissue or NCM from irradiated normal rectal tissue. **(E)** CD11c levels were significantly elevated on DCs treated with TCM from irradiated rectal cancer tissue and NCM from mock-irradiated rectal cancer tissue compared to LPS-induced expression of CD11c. TCM from irradiated rectal cancer tissue induced greater expression of CD11c compared to NCM from irradiated normal rectal tissue. All data expressed as mean  $\pm$  SEM. Statistical analysis was performed using a Wilcoxon signed-rank test when comparing the same tissue type i.e. Cancer 0 Gy vs Cancer 1.8 Gy and Mann Whitney U-test when comparing different tissue types and comparing to media control.  $n=14$  for cMedia,  $n=8$  for normal and cancer, \*\*\*\* $p<0.0001$ , \*\*\* $p<0.001$ , \*\* $p<0.01$ , \* $p<0.05$ .

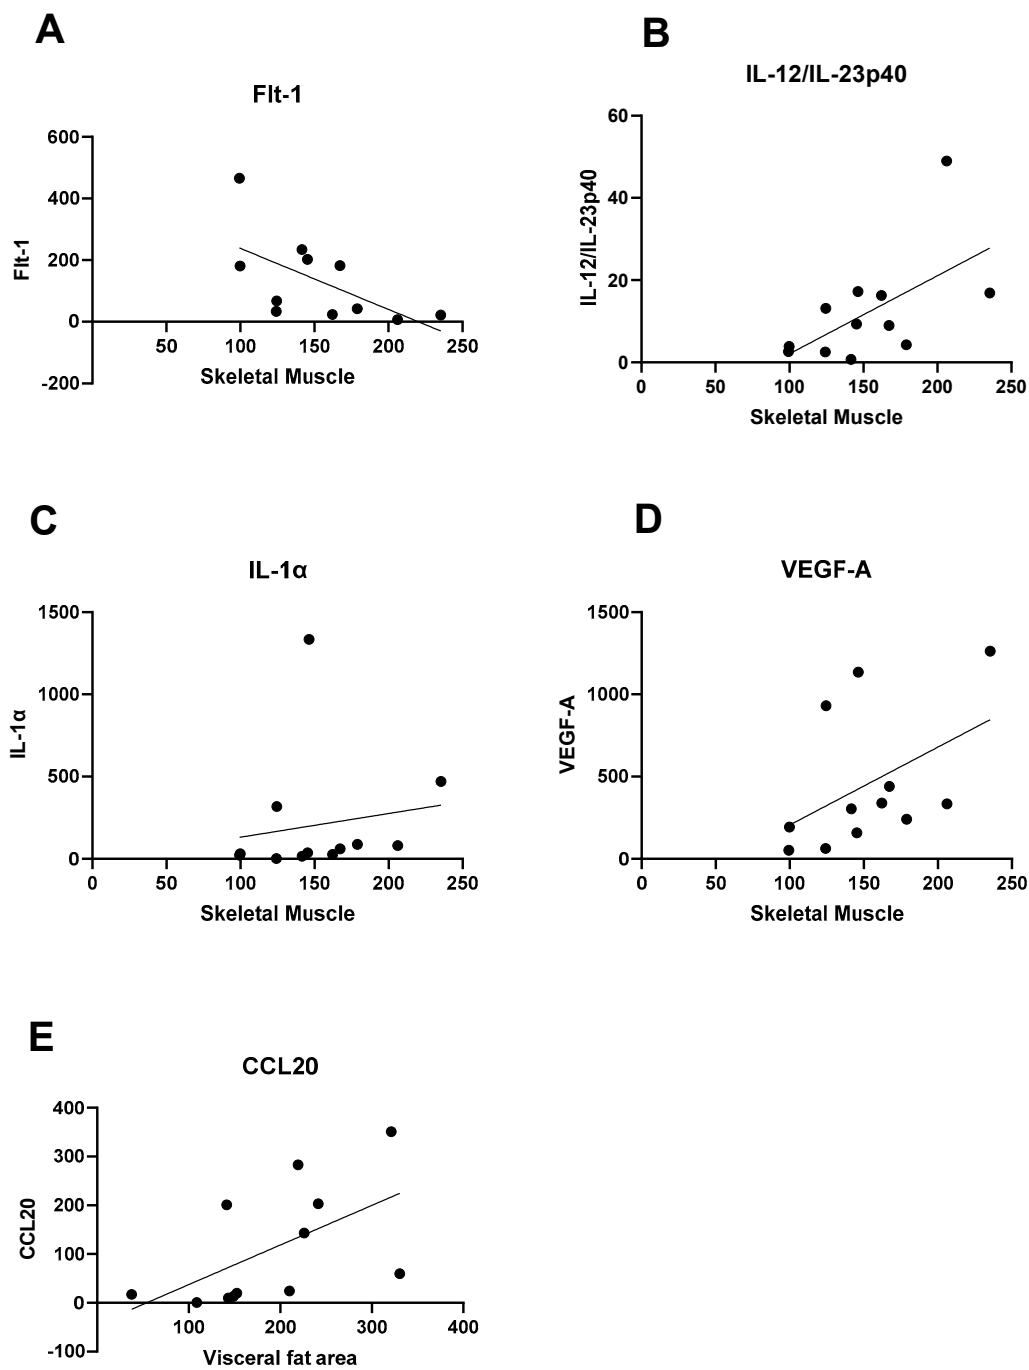

**Figure S2.** Correlations between secreted factors from mock-irradiated rectal cancer tissue (Cancer 0 Gy) and body composition parameter. (A) There was a significant inverse correlation between skeletal muscle and Flt-1 ( $R=-0.6273$ ,  $p=0.04$ ). (B) There was a significant correlation between skeletal muscle and IL-12/IL-23p40 ( $R=0.6573$ ,  $p=0.02$ ). (C) IL-1 $\alpha$  was significantly correlated with skeletal muscle ( $R=0.5874$ ,  $p=0.04$ ). (D) VEGF-A was significantly correlated with skeletal muscle ( $R=0.6224$ ,  $p=0.03$ ). (E) Visceral fat area was correlated with CCL20 ( $R=0.6783$ ,  $p=0.01$ ). Correlation analysis was performed using Spearman correlation coefficient.  $n=12$ ,  $n=11$  for Flt-1.

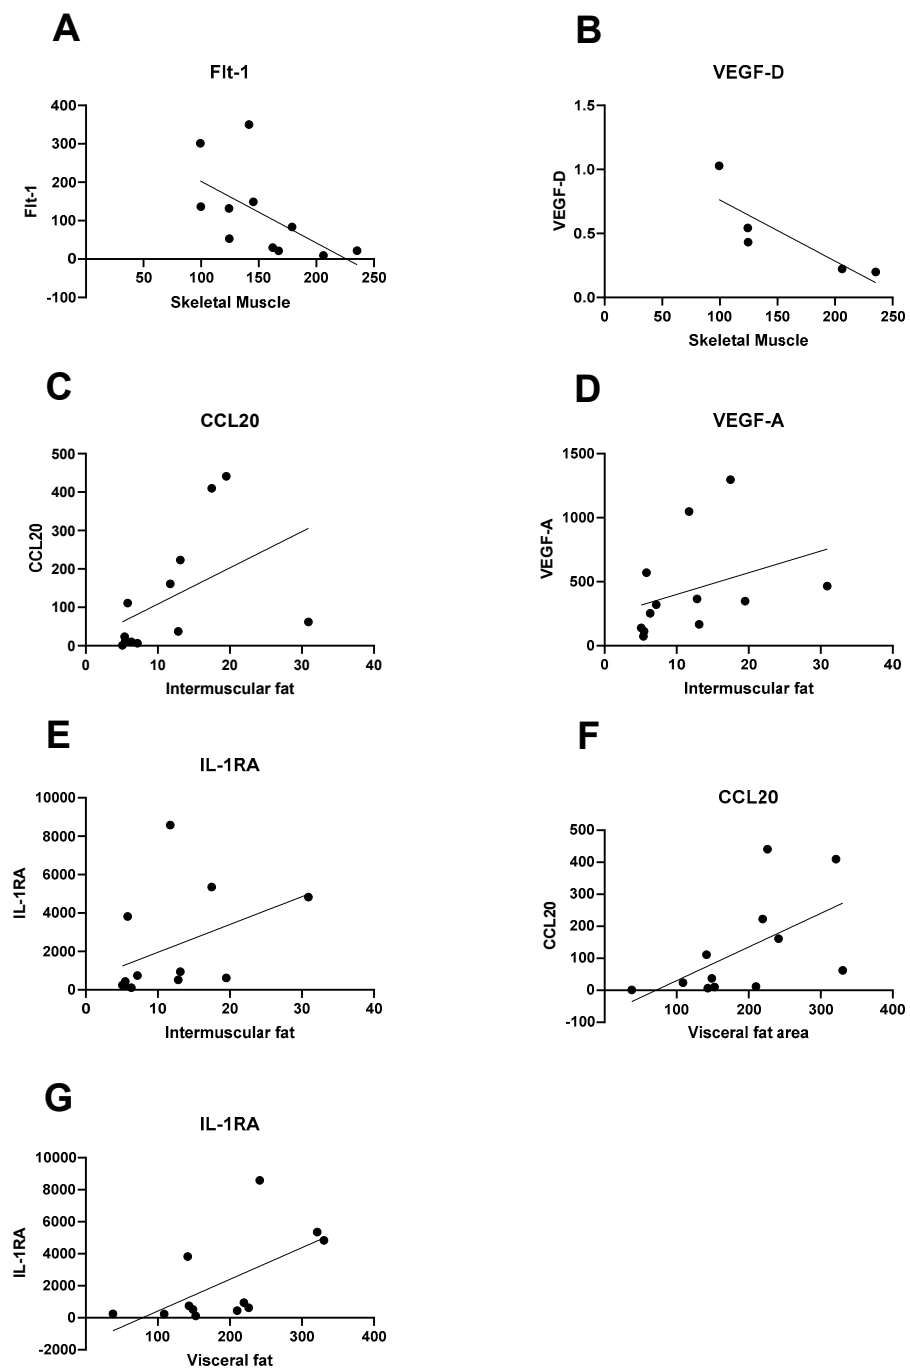

**Figure S3.** Correlations between secreted factors from irradiated rectal cancer tissue (Cancer 1.8 Gy) and body composition parameters (A) There was a significant inverse correlation between skeletal muscle and Flt-1 ( $R=-0.7182$ ,  $p=0.01$ ). (B) There was a significant inverse correlation between skeletal muscle and VEGF-D ( $R=-1$ ,  $p=0.01$ ). (C) CCL20 was significantly correlated with intermuscular fat ( $R=0.7133$ ,  $p=0.01$ ). (D) VEGF-A was significantly correlated with intermuscular fat ( $R=0.6084$ ,  $p=0.03$ ). (E) Intermuscular fat was correlated with IL-1RA ( $R=0.6084$ ,  $p=0.03$ ). (F) CCL20 correlated with visceral fat area ( $R=0.6643$ ,  $p=0.02$ ) and (G) There was a significant correlation between IL-1RA and visceral fat area ( $R=0.6503$ ,  $p=0.02$ ). Correlation analysis was performed using Spearman correlation coefficient.  $n=12$ ,  $n=11$  for Flt-1.

**Table S1.** Patient characteristics.

|                                    |                          |               | Percent (%) |
|------------------------------------|--------------------------|---------------|-------------|
| Age (rectal cancer patients)       | Mean ± SD                | 65.16 ± 10.14 |             |
|                                    | Range                    | 53-89         |             |
| Age (control patients)             | Mean ± SD                | 58.75 ± 11.42 |             |
|                                    | Range                    | 44-76         |             |
| Gender (rectal cancer patients)    | Male (n)                 | 8             | 66.67       |
|                                    | Female (n)               | 4             | 33.33       |
| Gender (control patients)          | Male (n)                 | 3             | 37.5        |
|                                    | Female (n)               | 5             | 62.5        |
| Obesity status (visceral fat area) | Obese                    | 8             | 66.67       |
|                                    | Non obese                | 4             | 33.33       |
| Histology                          | Adenocarcinoma (n)       | 12            | 100         |
| Stage of differentiation           | Moderate (n)             | 12            | 100         |
| T stage                            | T1 (n)                   | 1             | 8.33        |
|                                    | T2 (n)                   | 2             | 16.67       |
|                                    | T3 (n)                   | 8             | 66.67       |
|                                    | T4 (n)                   | 1             | 8.33        |
| N stage                            | N0 (n)                   | 6             | 50          |
|                                    | N1 (n)                   | 5             | 41.67       |
|                                    | N2 (n)                   | 1             | 8.33        |
| M stage                            | M0 (n)                   | 11            | 91.67       |
|                                    | M1 (n)                   | 1             | 8.33        |
| Neoadjuvant CRT                    | Received neo-CRT (n)     | 6             | 50          |
| Neoadjuvant CT                     | Received neo-CT only (n) | 1             | 8.33        |
| Neoadjuvant RT                     | Received neo-RT only (n) | 1             | 8.33        |
| Surgery <sup>a</sup>               | Received surgery (n)     | 11            | 91.67       |
| TRS <sup>b</sup>                   | 0 (n)                    | 2             | 28.57       |
|                                    | 1 (n)                    | 3             | 42.85       |
|                                    | 2 (n)                    | 1             | 14.28       |
|                                    | 3 (n)                    | 1             | 14.28       |

Abbreviations; CRT; chemoradiotherapy, CT; chemotherapy, RT; radiotherapy, TRS; tumour regression score <sup>a</sup> One patient was unsuitable for surgery <sup>b</sup> TRS available for 7 patients, percent expressed as total with TRS score.
